# Supplementary material for: Investigation of Vacancy-Ordered Double Perovskite Halides A2Sn1−xTixY6 (A = K, Rb, Cs; Y = Cl, Br, I): Promising Materials for Photovoltaic Applications
Source: MDPI journal article supplement (doi:10.3390/nano13202744), 2023-10-11
Supplement: s1 [file s1]

Table S1. the optimized lattice parameters (Å)and volume (Å<sup>3</sup>).

|                                                                   |   | X=0    | X=0.25 | X=0.5  | X=0.75 | X=1    |
|-------------------------------------------------------------------|---|--------|--------|--------|--------|--------|
| K <sub>2</sub> Sn <sub>1-x</sub> Ti <sub>x</sub> Cl <sub>6</sub>  | a | 10.243 | 10.190 | 10.125 | 10.083 | 10.025 |
|                                                                   | b | 10.243 | 10.190 | 10.148 | 10.083 | 10.025 |
|                                                                   | c | 10.243 | 10.190 | 10.148 | 10.083 | 10.025 |
|                                                                   | v | 1074.6 | 1058.1 | 1042.6 | 1025.0 | 1007.4 |
| K <sub>2</sub> Sn <sub>1-x</sub> Ti <sub>x</sub> Br <sub>6</sub>  | a | 10.850 | 10.795 | 10.698 | 10.667 | 10.613 |
|                                                                   | b | 10.850 | 10.795 | 10.741 | 10.667 | 10.613 |
|                                                                   | c | 10.850 | 10.795 | 10.741 | 10.667 | 10.613 |
|                                                                   | v | 1277.5 | 1258.1 | 1234.3 | 1213.8 | 1195.5 |
| K <sub>2</sub> Sn <sub>1-x</sub> Ti <sub>x</sub> I <sub>6</sub>   | a | 11.763 | 11.692 | 11.603 | 11.558 | 11.496 |
|                                                                   | b | 11.763 | 11.692 | 11.637 | 11.558 | 11.496 |
|                                                                   | c | 11.763 | 11.692 | 11.637 | 11.558 | 11.496 |
|                                                                   | v | 1627.5 | 1598.4 | 1571.2 | 1544.2 | 1519.3 |
| Rb <sub>2</sub> Sn <sub>1-x</sub> Ti <sub>x</sub> Cl <sub>6</sub> | a | 10.439 | 10.390 | 10.319 | 10.282 | 10.239 |
|                                                                   | b | 10.439 | 10.390 | 10.338 | 10.282 | 10.239 |
|                                                                   | c | 10.439 | 10.390 | 10.338 | 10.282 | 10.239 |
|                                                                   | v | 1137.7 | 1121.5 | 1102.8 | 1087.0 | 1073.4 |
| Rb <sub>2</sub> Sn <sub>1-x</sub> Ti <sub>x</sub> Br <sub>6</sub> | a | 11.000 | 10.941 | 10.862 | 10.827 | 10.790 |
|                                                                   | b | 11.000 | 10.941 | 10.887 | 10.827 | 10.790 |
|                                                                   | c | 11.000 | 10.941 | 10.887 | 10.827 | 10.790 |
|                                                                   | v | 1331.0 | 1309.7 | 1287.6 | 1269.3 | 1256.0 |
| Rb <sub>2</sub> Sn <sub>1-x</sub> Ti <sub>x</sub> I <sub>6</sub>  | a | 11.865 | 11.809 | 11.739 | 11.674 | 11.613 |
|                                                                   | b | 11.865 | 11.809 | 11.757 | 11.674 | 11.613 |
|                                                                   | c | 11.865 | 11.809 | 11.757 | 11.674 | 11.613 |
|                                                                   | v | 1670.1 | 1646.6 | 1622.7 | 1591.0 | 1566.2 |
| Cs <sub>2</sub> Sn <sub>1-x</sub> Ti <sub>x</sub> Cl <sub>6</sub> | a | 10.757 | 10.704 | 10.661 | 10.623 | 10.576 |
|                                                                   | b | 10.757 | 10.704 | 10.666 | 10.623 | 10.576 |
|                                                                   | c | 10.757 | 10.704 | 10.666 | 10.623 | 10.576 |
|                                                                   | v | 1244.7 | 1226.6 | 1212.8 | 1198.7 | 1182.9 |
| Cs <sub>2</sub> Sn <sub>1-x</sub> Ti <sub>x</sub> Br <sub>6</sub> | a | 11.268 | 11.189 | 11.154 | 11.112 | 11.064 |
|                                                                   | b | 11.268 | 11.189 | 11.167 | 11.112 | 11.064 |
|                                                                   | c | 11.268 | 11.189 | 11.167 | 11.112 | 11.064 |
|                                                                   | v | 1430.5 | 1400.9 | 1391.1 | 1372.2 | 1354.5 |
| Cs <sub>2</sub> Sn <sub>1-x</sub> Ti <sub>x</sub> I <sub>6</sub>  | a | 12.056 | 11.970 | 11.913 | 11.873 | 11.821 |
|                                                                   | b | 12.056 | 11.970 | 11.934 | 11.873 | 11.821 |
|                                                                   | c | 12.056 | 11.970 | 11.934 | 11.873 | 11.821 |
|                                                                   | v | 1752.1 | 1714.7 | 1696.8 | 1673.9 | 1652.0 |

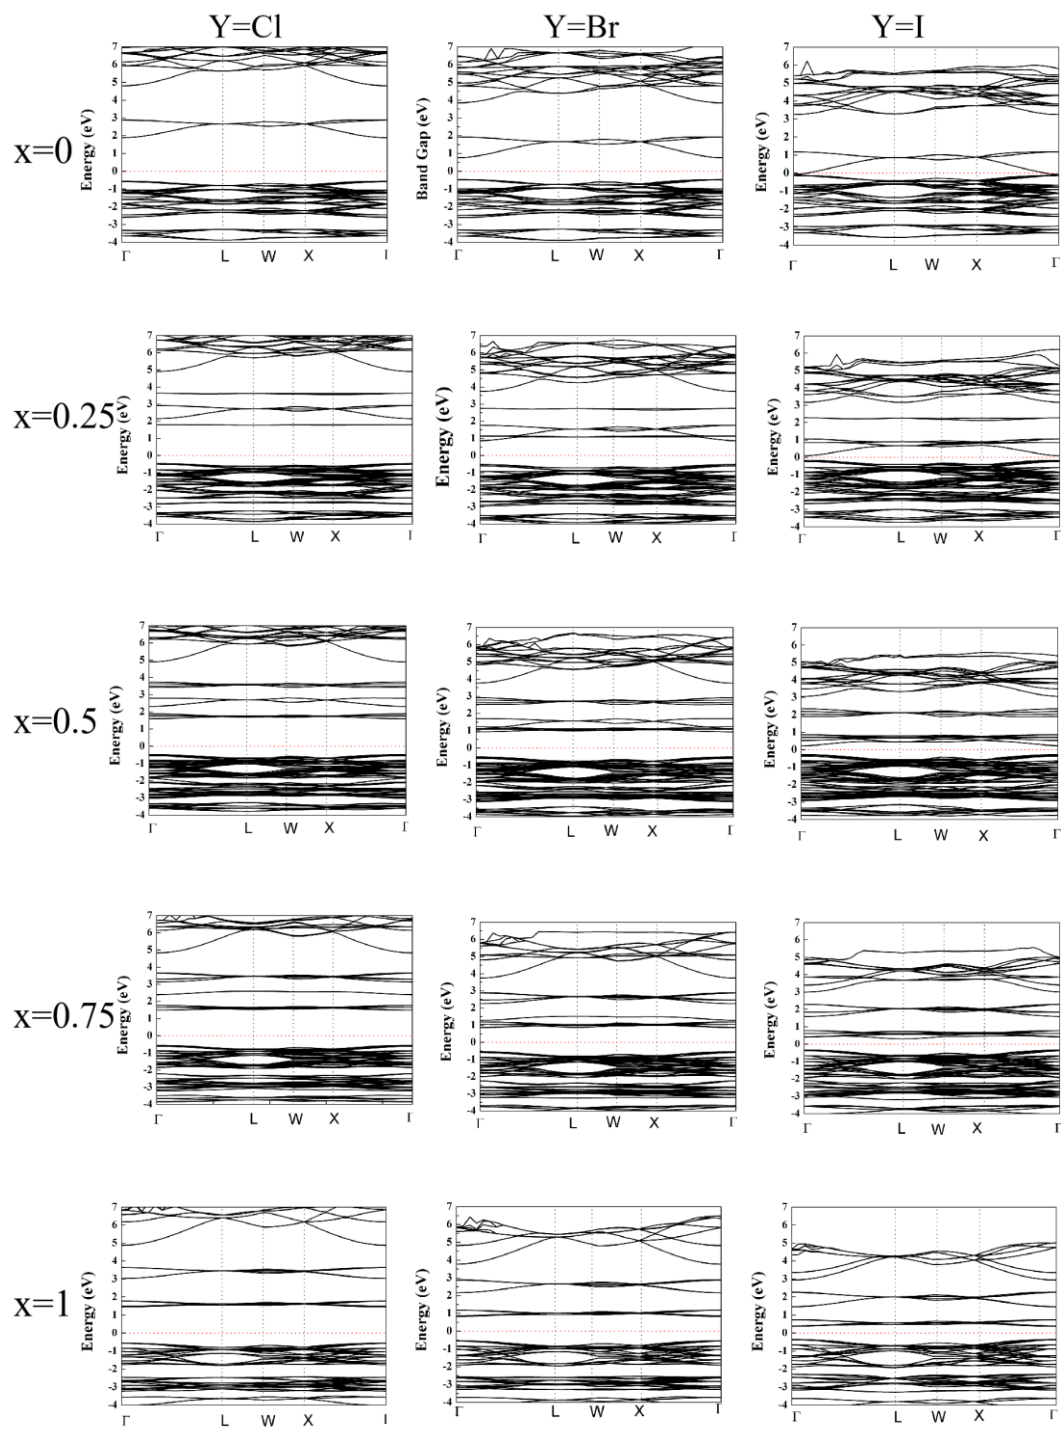

Figure S1. Band structures of  $\text{K}_2\text{Sn}_{1-x}\text{Ti}_x\text{Y}_6$ .

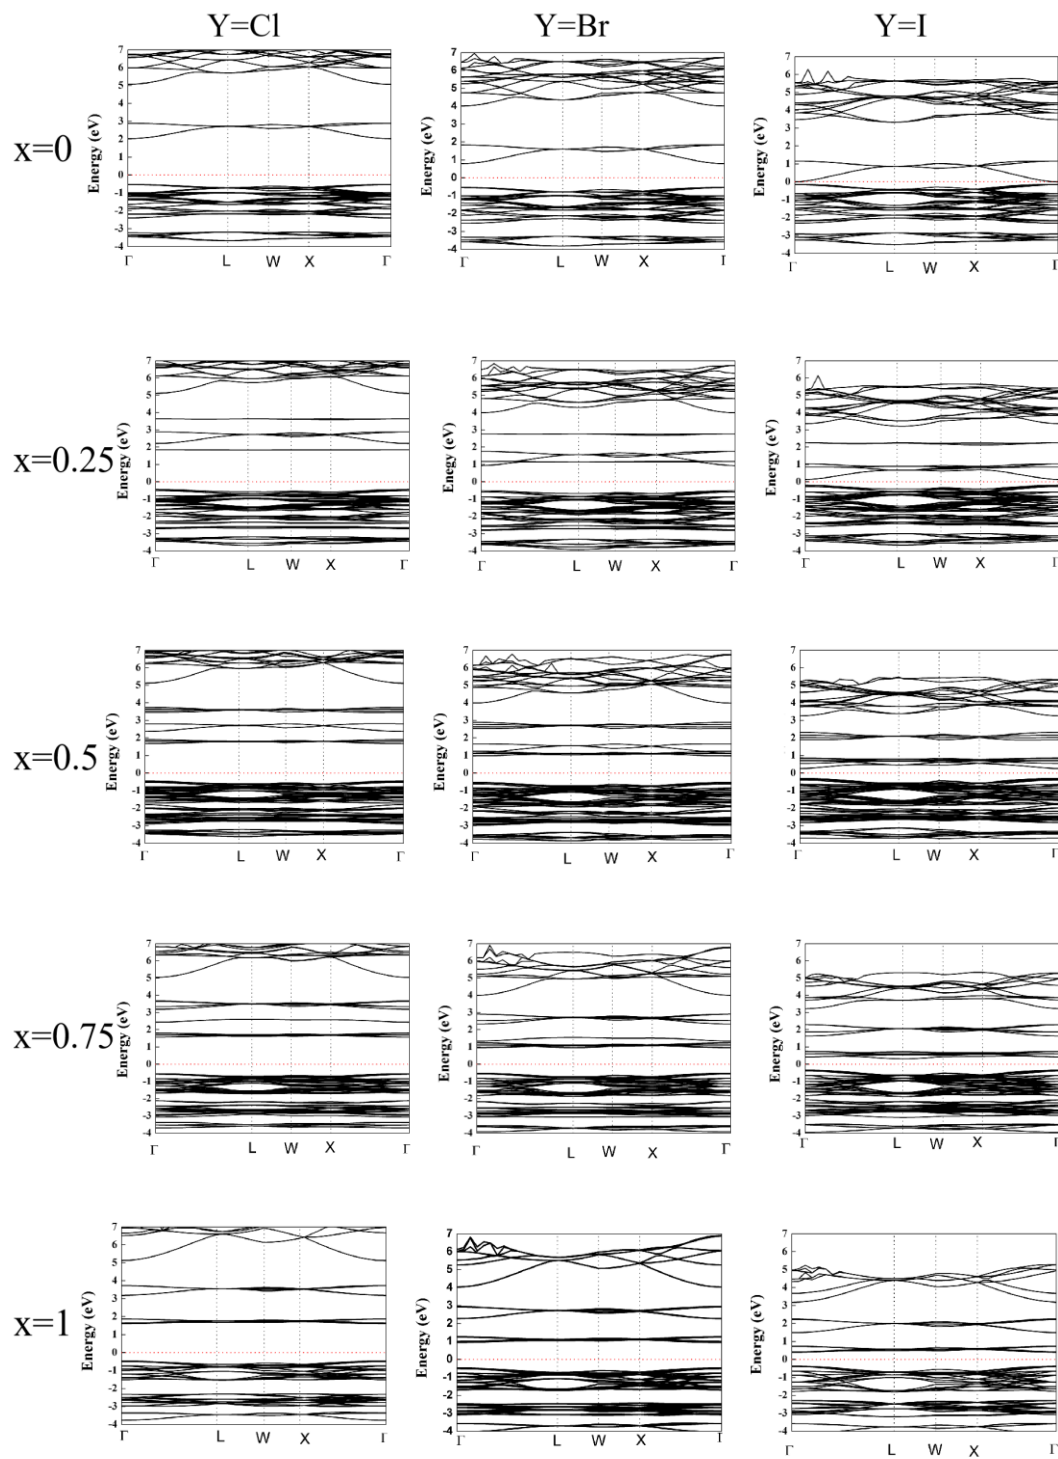

Figure S2. Band structures of  $\text{Rb}_2\text{Sn}_{1-x}\text{Ti}_x\text{Y}_6$ .

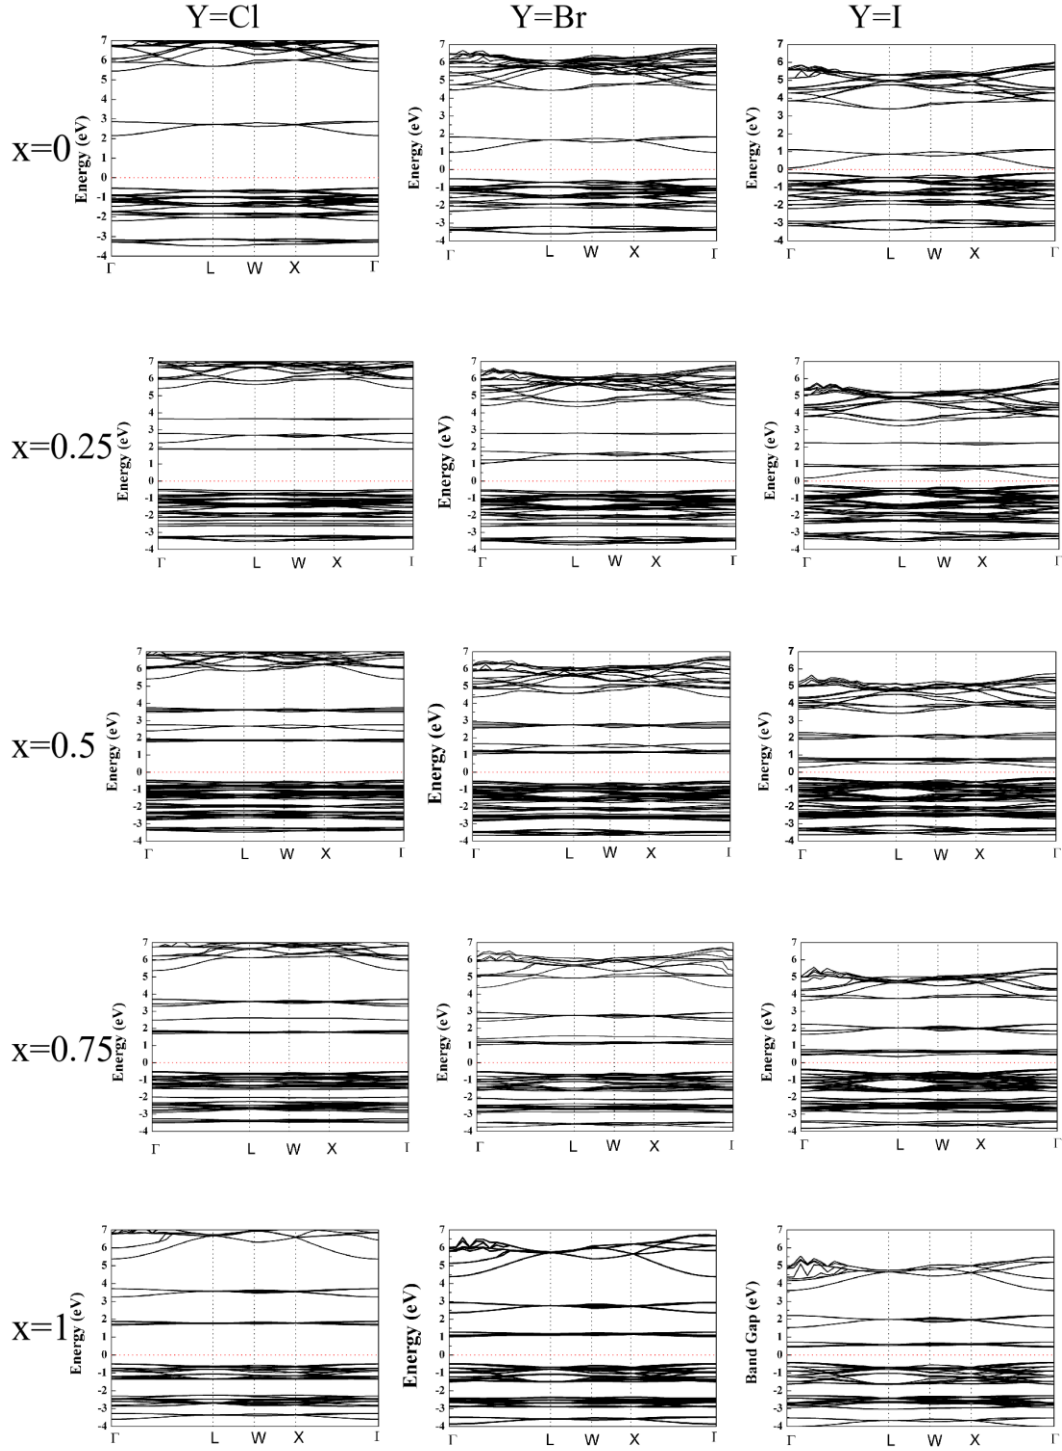

Figure S3. Band structures of  $\text{Cs}_2\text{Sn}_{1-x}\text{Ti}_x\text{Y}_6$ .
